# Supplementary material
Source: publisher figshare collection journal article supplement (https://acs.figshare.com/ndownloader/files/12465221)
Supplement: Supplementary file 1 [file 12465221]

# Supporting Information

## Hexapod PtRuCu Nanocrystalline Alloy for Highly Efficient and Stable Methanol Oxidation

*Shengfeng Xue,<sup>1†</sup> Wentao Deng,<sup>2†</sup> Fang Yang,<sup>1†</sup> Jinlong Yang,<sup>1</sup> Ibrahim Saana*

*Amiin, <sup>1</sup>Daping He, <sup>1,3\*</sup> Haolin Tang, <sup>1\*</sup> Shichun Mu<sup>1\*</sup>*

<sup>1</sup> State Key Laboratory of Advanced Technology for Materials Synthesis and Processing, Wuhan University of Technology, Wuhan 430070, China

<sup>2</sup> Department of Chemistry, University of Bath, Claverton Down, Bath BA2 7AY, U.K.

<sup>3</sup> Hubei Engineering Research Center of RF-Microwave Technology and Application, Wuhan University of Technology, Wuhan 430070, China

[\\*hedaping@whut.edu.cn](mailto:*hedaping@whut.edu.cn)

[\\*tanghaolin2005@yahoo.com.cn](mailto:*tanghaolin2005@yahoo.com.cn)

[\\*msc@whut.edu.cn](mailto:*msc@whut.edu.cn)

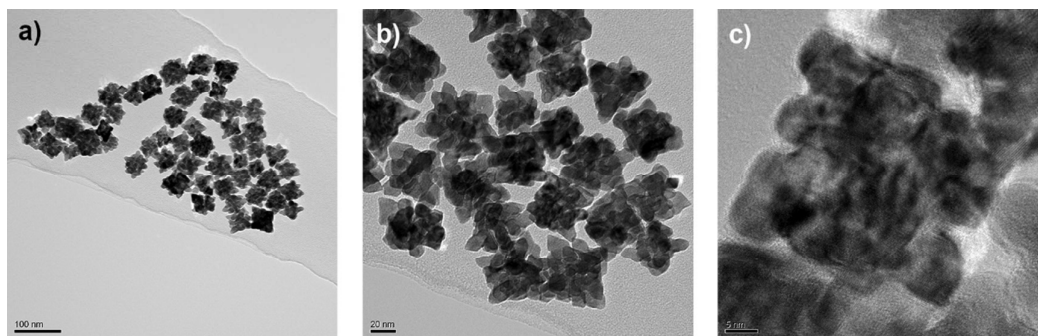

**Figure S1** Representative (a, b) TEM images and (c) HRTEM image for PtRuCu dendrites synthesized by extending the reaction time to 2 h. Scale bar: (a) 100 nm; (b) 20 nm; (c) 5 nm.

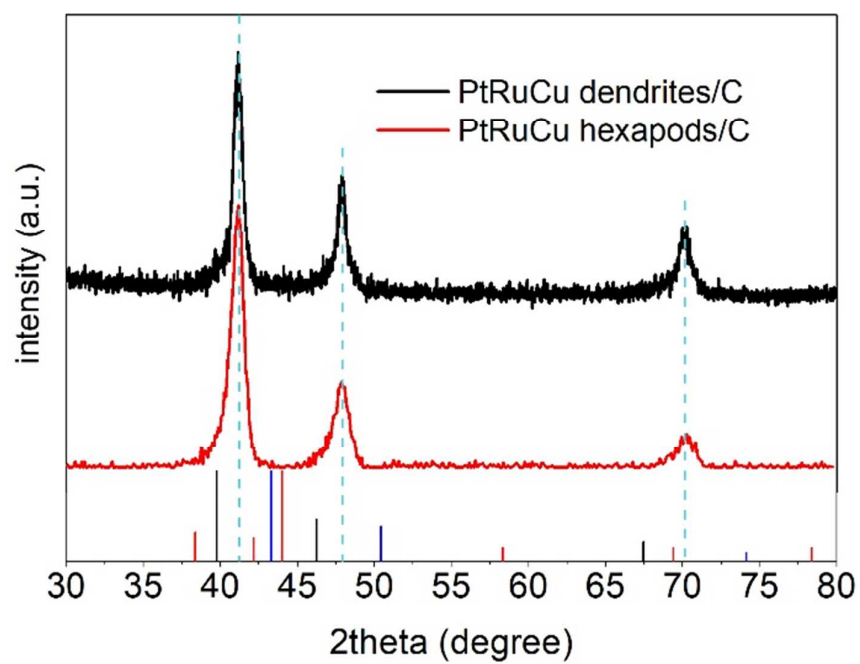

**Figure S2** XRD patterns of PtRuCu (i.e. hexapods)/C and PtRuCu dendrites/C.

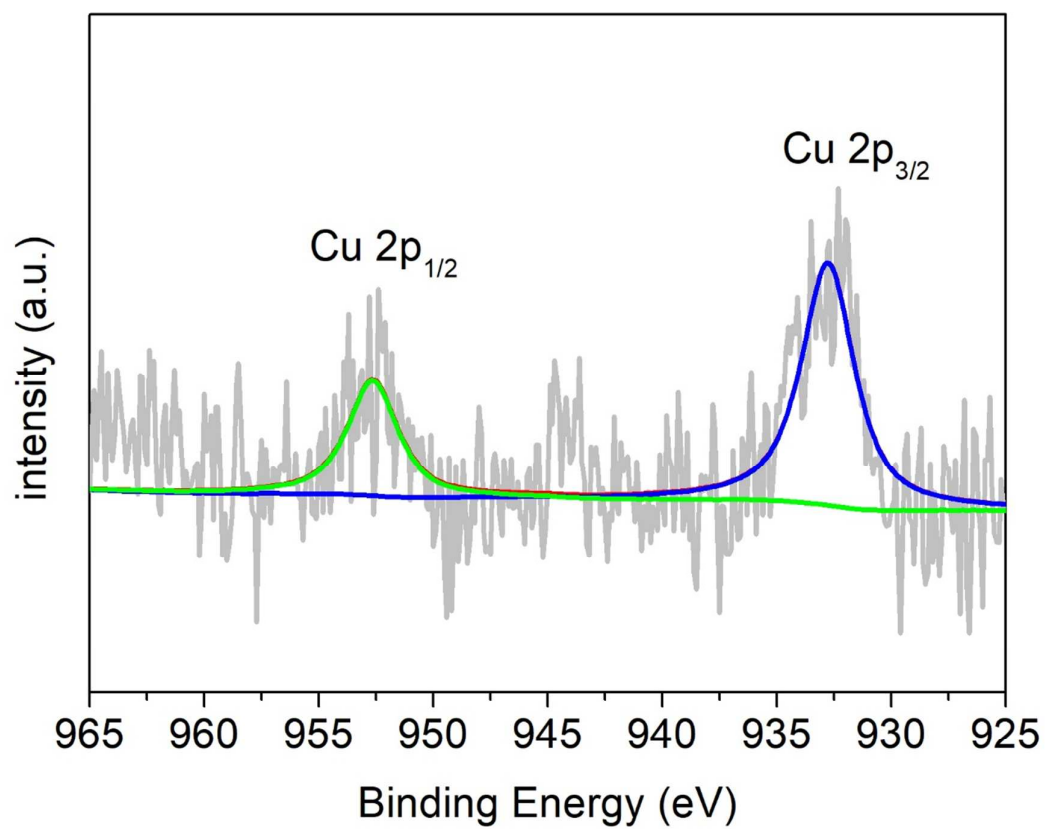

**Figure S3** XPS spectrum in Cu 2p region of PtRuCu

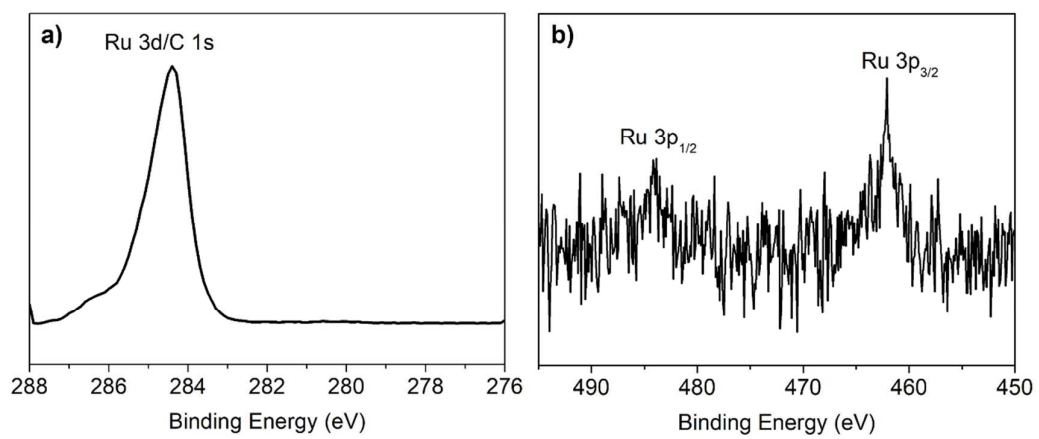

**Figure S4** XPS spectra of (a) Ru 3d and C 1s regions and (b) Ru 3p region for PtRuCu.

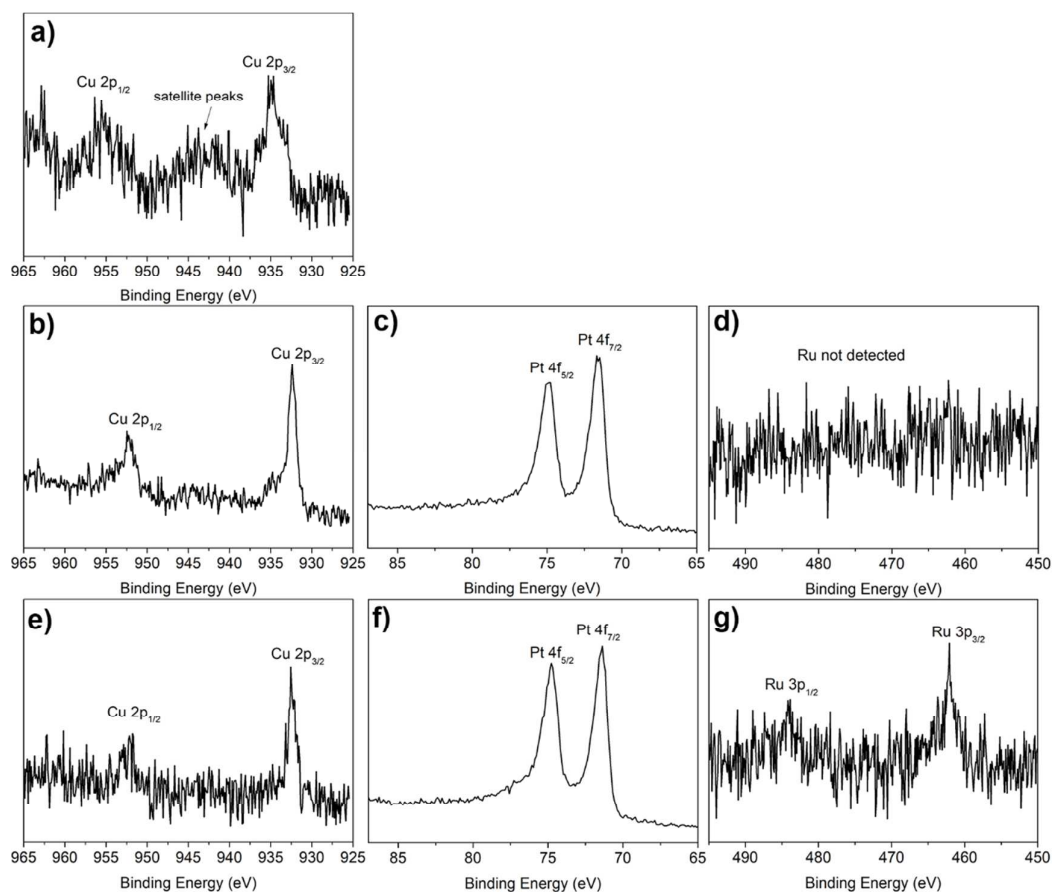

**Figure S5** XPS spectra of elemental changes in Cu, PtCu and PtRuCu. a) Cu 2p region of synthesized Cu; b-d) Cu 2p, Pt 4f and Ru 3p region of PtCu octahedra; e)-g) Cu 2p, Pt 4f and Ru 3p region of PtRuCu hexapods.

**Figure S5** shows the XPS spectra of the products at different stages from Cu→PtCu→PtRuCu. In Figure R5a, the satellite peaks and the main peak locate at ~935 eV, indicating that the main component of the product is CuO. The most possible reason is that as-synthesized Cu could be oxidized in air.<sup>1</sup> No satellite peaks are observed in the spectra of PtCu and PtRuCu (**Figure R5b** and **Figure R5e**), confirming that Cu(OAc)<sub>2</sub> is completely reduced to metallic Cu with the prolongation of the reaction time and the addition of Pt(acac)<sub>2</sub>. From the spectra of Pt in PtCu and PtRuCu (**Figure**

**R5c** and **R5f**),  $\sim 0.2$  eV negative shift appears in PtRuCu compared to PtCu, verifying that Pt alloys better with Cu as reaction time increased. **Figure R5d** and **Figure R5g** show the XPS spectra in Ru 3p region. Ru cannot be detected in PtCu (the product was obtained when  $\text{Ru}(\text{acac})_3$  and  $\text{Pt}(\text{acac})_2$  were added and heated for 30 min) but appears in PtRuCu (the product was obtained when  $\text{Ru}(\text{acac})_3$  and  $\text{Pt}(\text{acac})_2$  was added and heated for 60 min). This proves that  $\text{Ru}(\text{acac})_3$  is barely reduced due to the insufficient reaction time, and the  $\text{Pt}(\text{acac})_2$  has priority in the reduction reaction

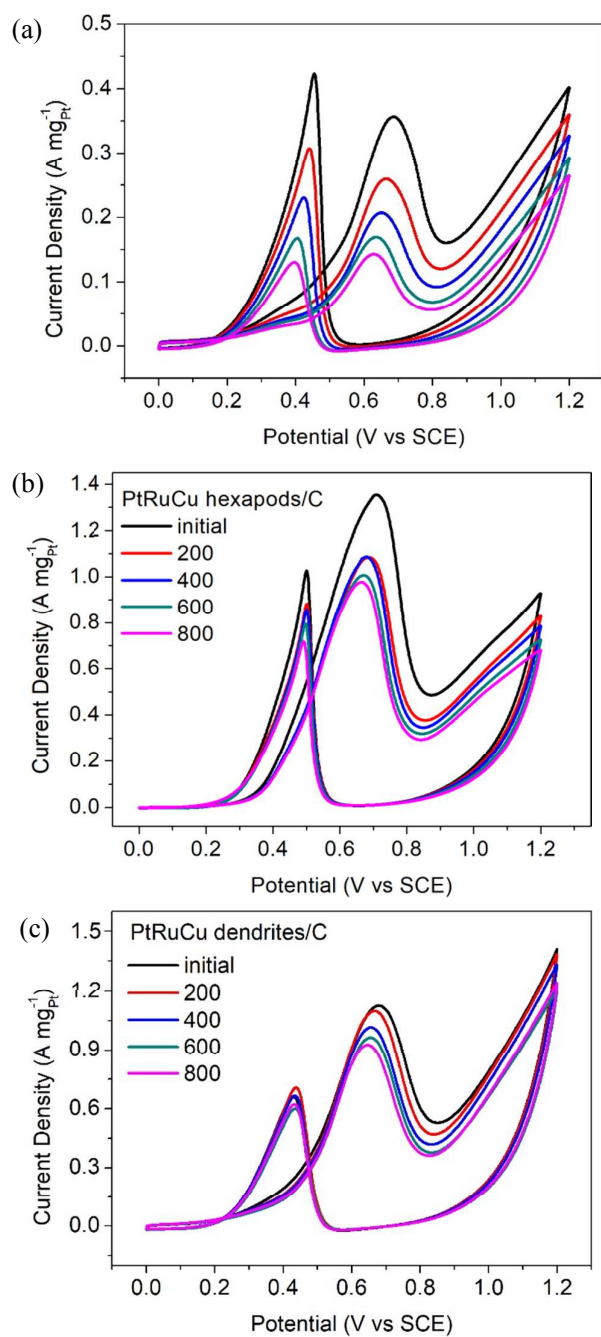

**Figure S6** MOR performance of (a) Pt/C and (b)PtRuCu/C and (c)PtRuCu dendrites/C after 0, 200, 400, 600 and 800 CV cycles.



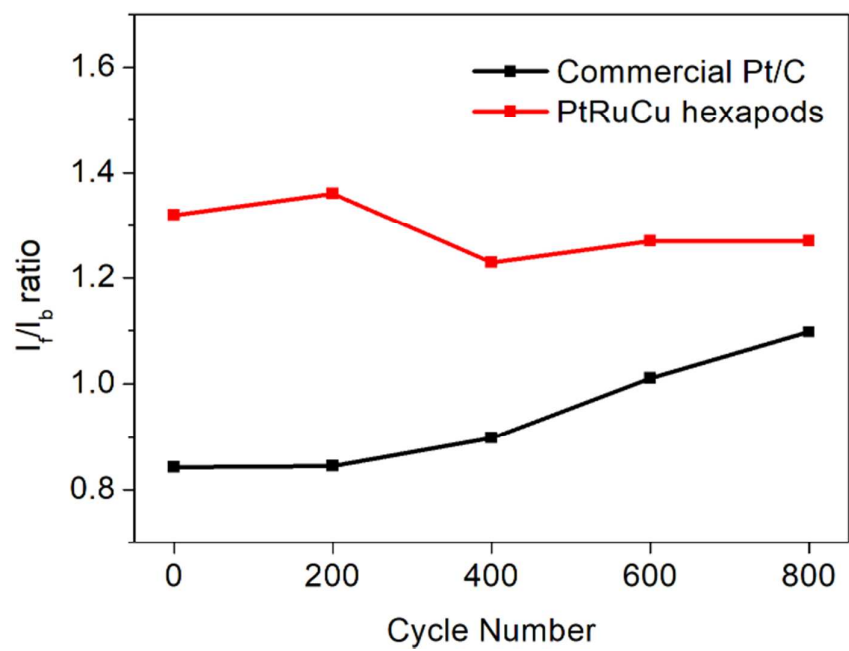

**Figure S7** Ratio of  $I_f/I_b$  for commercial Pt/C and PtRuCu/C after different CV cycles in  
0.1M  $\text{HClO}_4$ +1M  $\text{CH}_3\text{OH}$

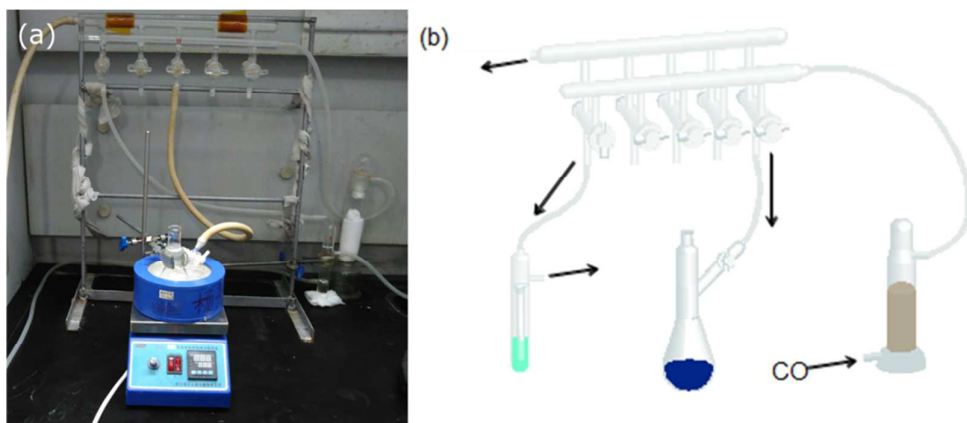

**Figure S8** (a) Reaction devices used in the synthesis and (b) its sketch map.

Table S1 XPS spectrum peaks for Pt/C PtRuCu hexapods/C and Cu in different regions.

|                      | <b>Pt/C</b> | <b>PtRuCu</b> | <b>Cu</b> |
|----------------------|-------------|---------------|-----------|
| <b>Pt 4f 7/2</b>     | 71.50 eV *  | 71.10 eV *    |           |
| <b>Pt 4f 5/2</b>     | 74.80 eV *  | 74.59 eV *    |           |
| <b>Pt(0) 4f 7/2</b>  | 71.50 eV    | 71.18 eV      |           |
| <b>Pt(0) 4f 5/2</b>  | 74.90 eV    | 74.58 eV      |           |
| <b>Pt(II) 4f 7/2</b> | 72.66 eV    | 72.98 eV      |           |
| <b>Pt(II) 4f 5/2</b> | 76.06 eV    | 76.38 eV      |           |
| <b>Cu 2p 3/2</b>     |             | 932.80 eV     | 932.60 eV |
| <b>Cu 2p 1/2</b>     |             | 952.66 eV     | 952.20 eV |

\* : raw data
